# Supplementary material for: Preparation of THPC-generated silver, platinum, and palladium nanoparticles and their use in the synthesis of Ag, Pt, Pd, and Pt/Ag nanoshells
Source: Royal Society of Chemistry journal article supplement (doi:10.1039/c6ra10717f), 2016-01-01
Supplement: c6ra10717f1.pdf [file c6ra10717f1.pdf]

## SUPPORTING INFORMATION

for

### **Preparation of THPC-Generated Silver, Platinum, and Palladium Nanoparticles and Their Use in the Synthesis of Ag, Pt, Pd, and Pt/Ag Nanoshells**

William W. Bryan,<sup>a</sup> Andrew C. Jamison,<sup>a</sup> Pawilai Chinwangso,<sup>a</sup> Supparesk Rittikulsittichai,<sup>a</sup>  
Tai-Chou Lee,<sup>b</sup> and T. Randall Lee<sup>a,\*</sup>

*<sup>a</sup>Department of Chemistry and the Texas Center for Superconductivity,  
University of Houston, 4800 Calhoun Road, Houston, TX 77204-5003, United States*

*<sup>b</sup>Department of Chemical and Materials Engineering,  
National Central University, 300 Jhongda Road, Jhongli City 32001, Taiwan*

\*Corresponding Author: [trlee@uh.edu](mailto:trlee@uh.edu)

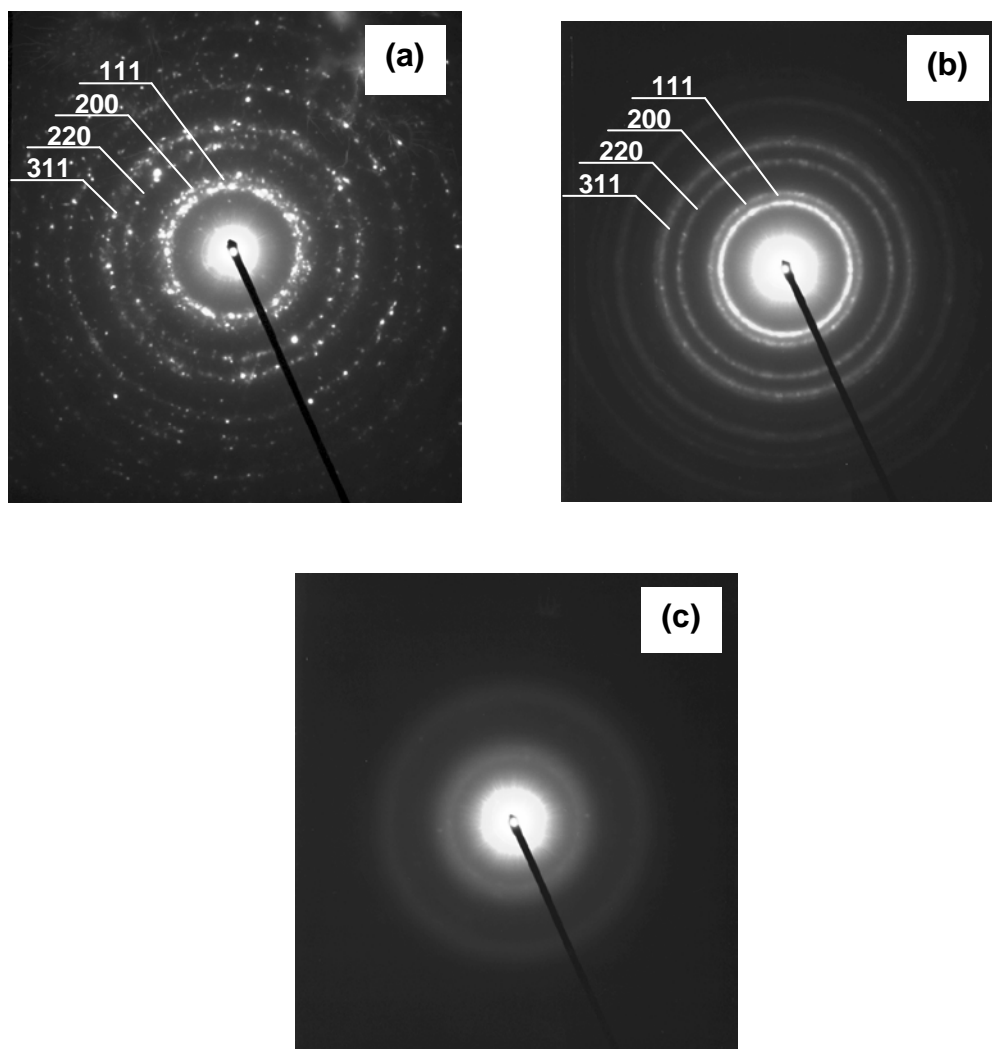

**Figure S1.** Selected area electron diffraction (SAED) patterns of THPC metal nanoparticles: (a) silver, (b) platinum, and (c) palladium.

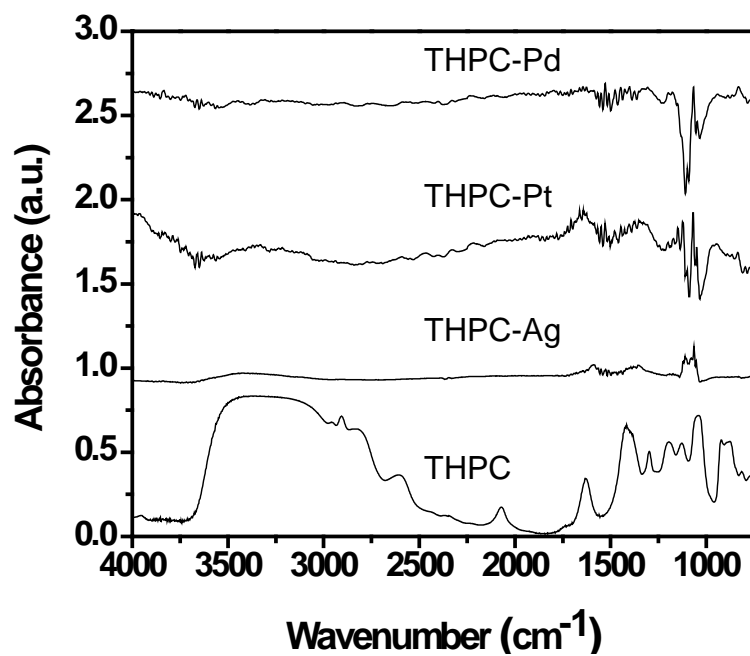

**Figure S2.** Fourier transform infrared (FT-IR) spectra of THPC silver, platinum, and palladium nanoparticles.
